# Supplementary material for: Cellular senescence limits translational readthrough
Source: Oxford University Press journal article supplement (doi:10.1242/bio.058688), 2021-10-22
Supplement: bio058688supp.pdf [file bio058688supp.pdf]

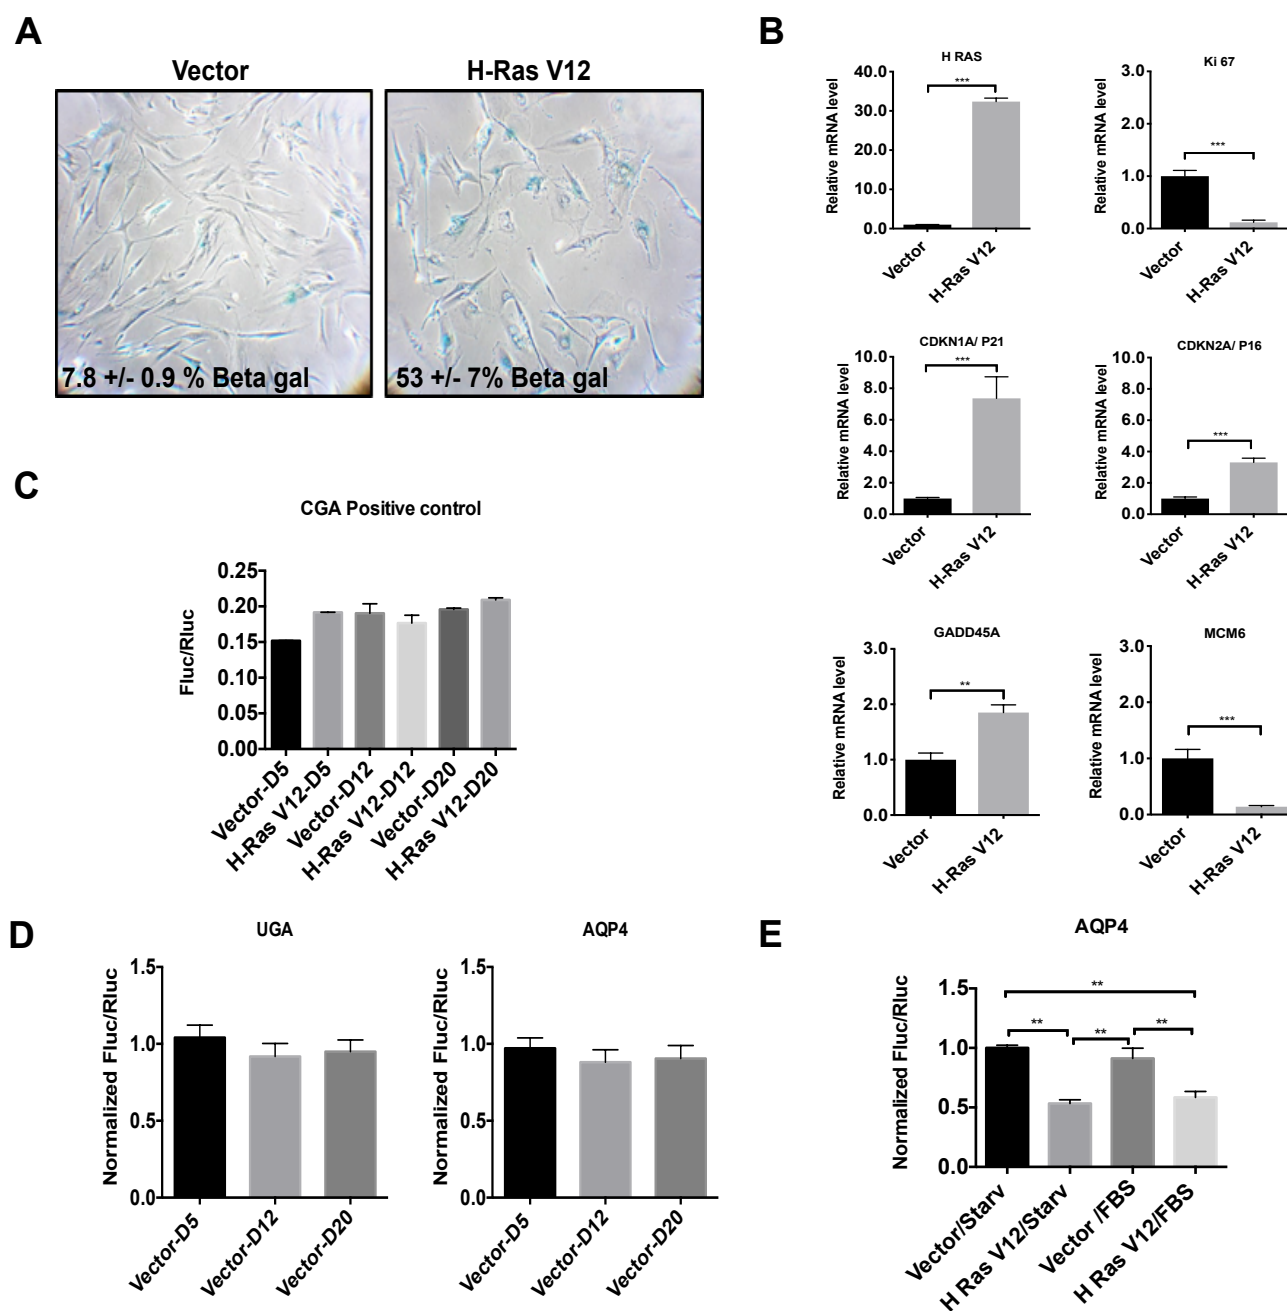

**Fig. S1. Readthrough is reduced in OIS.** **A.** SA- $\beta$ -gal of proliferating (Vector) and senescent IMR90 (H-RasV12 oncogene) cells, fixed at day 12 post-infection. Data were quantified from many fields within one experiment to represent the entire petri dish. Three independent cell counts up to a total of at least 100 cells are presented as the mean and SD of positive cells. **B.** RT-qPCRs for senescent marker mRNAs were performed in IMR-90 cells at day 12 post-infection for cells as in **(A)**. Data are normalized over TBP and HMBS, and presented as means relative to vector infected cells. Error bars indicate SD of technical triplicates. \*\* =  $p < 0.01$ , \*\*\* =  $p < 0.001$  are significantly different, using two-tailed Student's t-test. **C.** Luciferase activities from non-readthrough control (CGA-Positive control) in proliferating (Vector) and H-RasV12 senescent cells measured at days 5 (D5), 12 (D12) and 20 (D20) post-infection. Assays are representative of 2 independent experiments with similar results with technical triplicates for each experiment. One-way ANOVA with post-hoc Tukey HSD were performed. Error bars indicate SD of technical triplicates. **D.** Normalized Fluc/Rluc ratios indicate that readthrough level does not change in non-senescent cells (Vector) at day 5 (D5), 12 (D12) or 20 (D20) post-infection. Error bars indicate SD of biological triplicates. **E.** Luciferase activities from AQP4 reporter were measured at day 12 post-infection. Normalized Fluc/Rluc ratios from non-senescent (Vector) and senescent cells (H-RasV12), starved (Starv) or supplied with fetal bovine serum (FBS) are represented. Starvation was performed for a week to induce quiescence. Data are presented as means relative to empty vector-infected cells, which are representative of 2 independent experiments with similar results with technical triplicates for each experiment. One-way ANOVA with post-hoc Tukey HSD were performed. Error bars indicate SD of technical triplicates. Tukey HSD p-values indicate that \* =  $p < 0.05$ , \*\* =  $p < 0.01$ , \*\*\* =  $p < 0.001$  are significantly different.

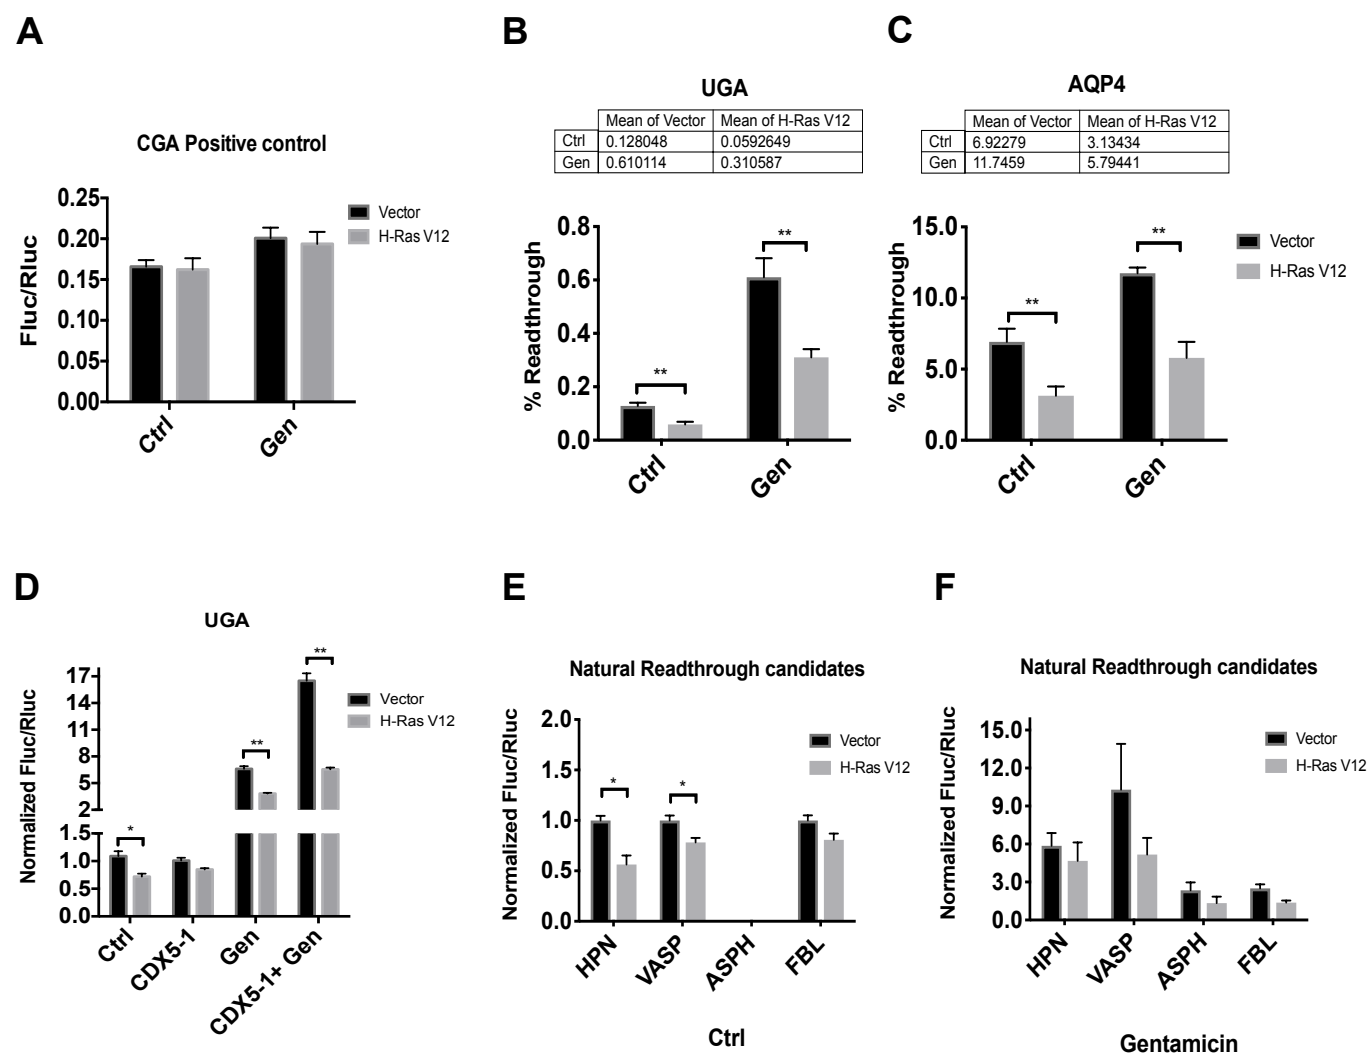

**Fig. S2. Senescent cells are resistant to gentamicin-induced readthrough.** **A.** IMR-90 cells were transduced with an empty vector

(Vector) or H-RasV12 oncogene to induce OIS and with indicated non-readthrough control luciferase reporter. Cells were treated with vehicle (Ctrl) or with 900  $\mu\text{g/ml}$  of gentamicin sulfate (Gen) 24 hours before measuring luciferase activities at day 12 post-infection. Error bars indicate SD of biological triplicates. **B-C.** The percent of readthrough was determined by dividing Fluc/Rluc ratio from UGA or AQP4 luciferase reporters by Fluc/Rluc ratio from non-readthrough controls multiplied by 100. Error bars indicate SD of biological triplicates. \*\* =  $p < 0.01$  is significantly different, using two-tailed Student's t-test. **D.** IMR-90 cells were transduced with an empty vector (Vector) or H-RasV12 oncogene to induce OIS and with a UGA luciferase reporter. Cells were treated with vehicle (Ctrl) and/or 600  $\mu\text{g/ml}$  of gentamicin sulfate (Gen) and/or 25  $\mu\text{M}$  of CDX5-1 72 hours before measuring luciferase activities at day 12 post-infection. Error bars indicate SD of biological triplicates. \* =  $p < 0.05$ , \*\* =  $p < 0.01$  are significantly different, using two-tailed Student's t-test. **E.** A stop codon within natural contexts from VASP, ASPH, HPN and FBL, was inserted in the intercistronic region of Rluc-Fluc luciferase reporter. IMR-90 cells were transduced with an empty vector (Vector) or H-RasV12 oncogene to induce OIS and with luciferase reporters. Luciferase activities were measured in non-senescent and senescent cells at day 12 post-infection. Error bars indicate SD of biological triplicates. \* =  $p < 0.05$  is significantly different, using two-tailed Student's t-test. **F.** Cells as in (**E**) were treated with 900  $\mu\text{g/ml}$  of gentamicin sulfate (Gen) 24 hours before measuring luciferase activities at day 12 post-infection. Normalized Fluc/Rluc ratios indicate the efficiency of readthrough. Normalizations are presented as means relative to vector-infected cells from three independent experiments with technical triplicates for each experiment. Unpaired Student's t-test with equal SD were performed. Error bars indicate SD of biological triplicates.

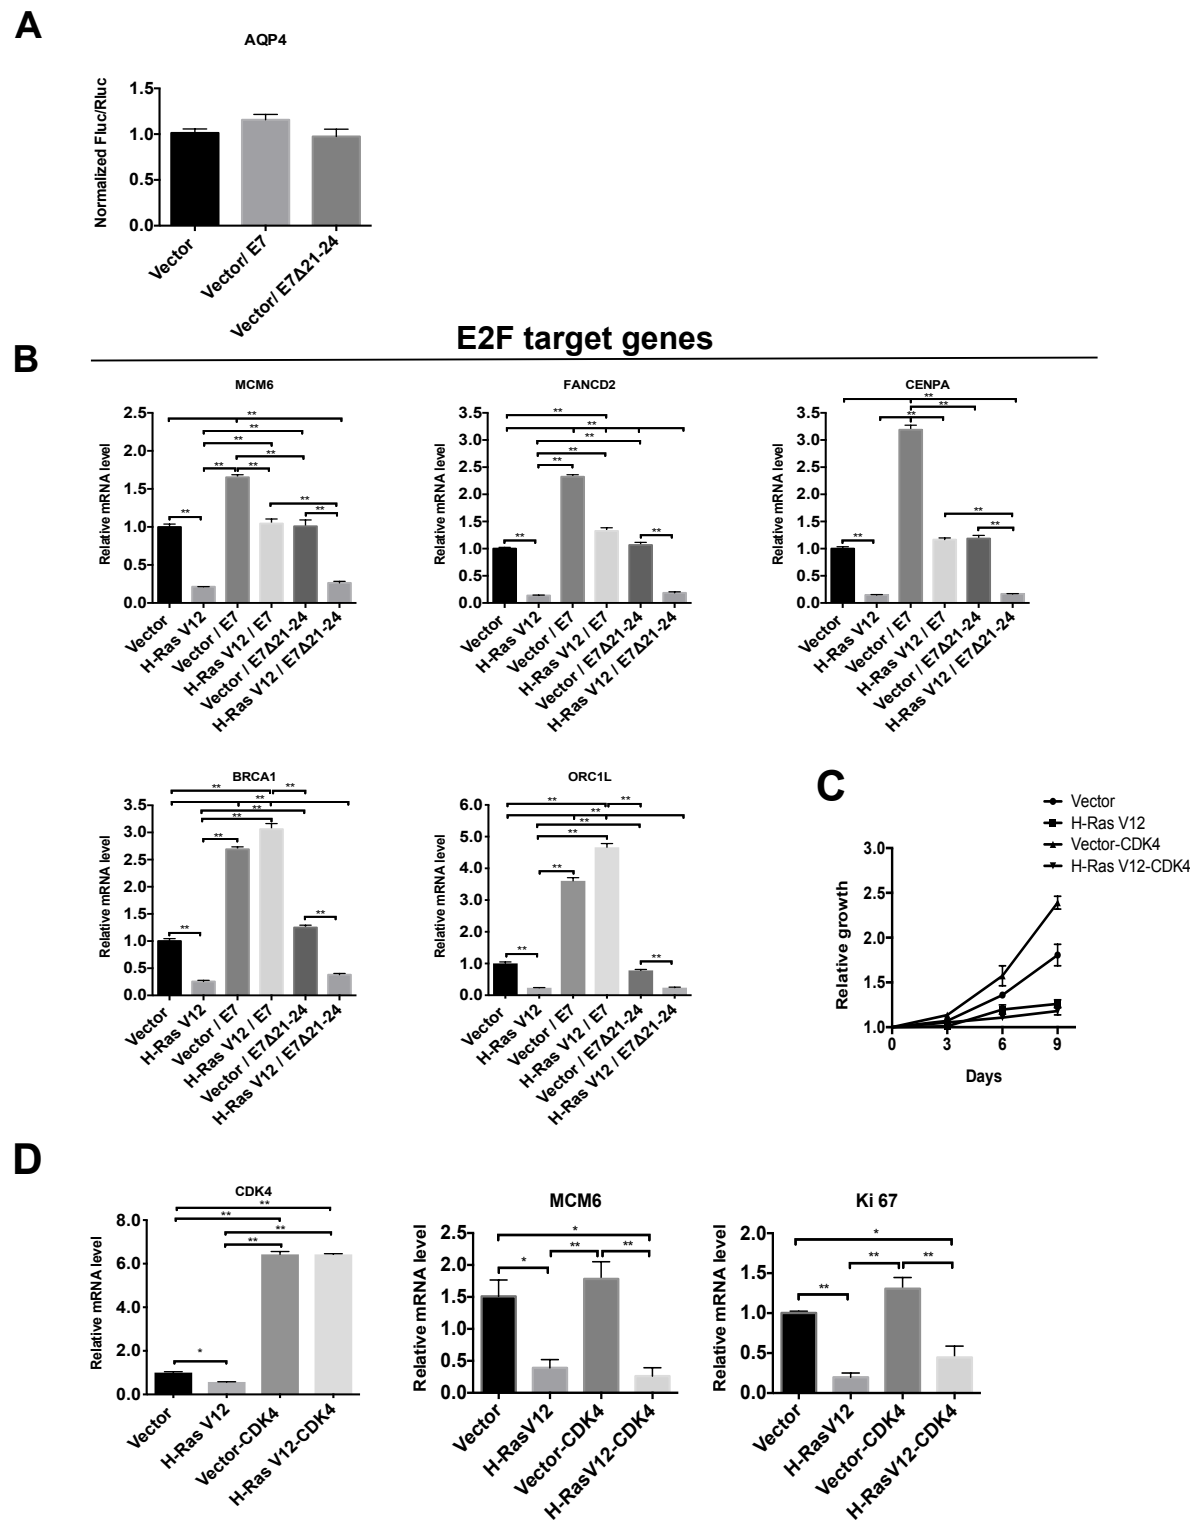

**Fig. S3. RB pathway disruption affects the efficiency of readthrough.** **A.** IMR-90 cells were transduced with luciferase reporter AQP4 and an empty vector (Vector), wild-type E7 or E7  $\Delta$ 21-24 mutant oncogene. Luciferase activities were measured at day 12 post-infection. Normalized Fluc/Rluc ratios indicate the efficiency of readthrough. Normalizations are presented as means relative to vector-infected cells from three independent experiments with technical triplicates for each experiment. Error bars indicate SD of biological triplicates. **B.** Representative RT-qPCR from E2Fs' target mRNAs were performed in IMR-90 cells transduced with an empty control vector (pLXSN), wild-type E7 or E7  $\Delta$ 21-24 mutant oncogene, and with an empty vector (Vector) or with H-RasV12 oncogene to induce OIS at day 12 post-infection. Data are normalized over TBP and HMBS, and presented as means relative to vector infected cells. Experiments were done three times with technical triplicates for each experiment. Error bars indicate SD of technical triplicates. Tukey HSD p-values indicate that \*\* =  $p < 0.01$  is significantly different. **C.** Growth curves of non-senescent (Vector) and H-RasV12 senescent IMR-90s overexpressing or not CDK4. Data are presented as means normalized to day 0 of each condition. Assays are representative of 2 independent experiments with similar results with technical triplicates for each experiment. Error bars indicate SD of technical triplicates. **D.** RT-qPCRs for CDK4, MCM6 and Ki67 mRNAs were performed in IMR-90 cells as in (C) and at day 12 post-infection. Data are normalized over TBP and HMBS, and presented as means relative to vector infected cells from three independent experiments with technical triplicates for each experiment. One-way ANOVA with post-hoc Tukey HSD were performed in (A, B, D) and Unpaired Student's t-test with equal SD was performed in (C). Error bars indicate SD of biological triplicates. Tukey HSD p-values indicate that \* =  $p < 0.05$ , \*\* =  $p < 0.01$  are significantly different.

## A E2F target genes

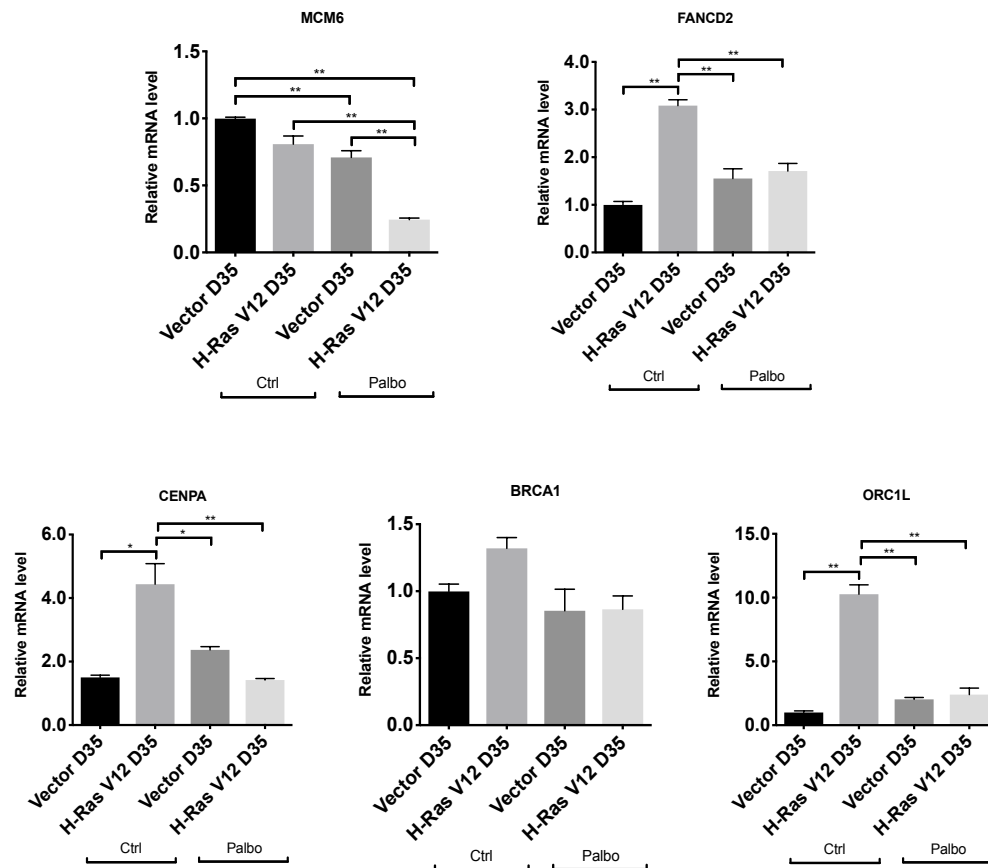

**Fig. S4. E2Fs target genes.A.** RT-qPCR for E2Fs' target mRNAs were performed in IMR-90 at day 35 post-infection with an empty vector (Vector D35) or with the oncogene H-RasV12 (H-RasV12 D35) and treated with vehicle (Ctrl) or with 1  $\mu$ M of palbociclib (Palbo) for 5 days before cell lysis. Data are normalized over TBP and HMBS, and presented as means relative to vector infected cells from three independent experiments with technical triplicates for each experiment. One-way ANOVA with post-hoc Tukey HSD were performed. Error bars indicate SD of technical triplicates. Tukey HSD p-values indicate that \* =  $p < 0.05$ , \*\* =  $p < 0.01$  are significantly different.

**Table S1. PCR cloning primers**

| Name                              | 5' forward primer (5'-3')                                               | 3' reverse primer (5'-3')                                            |
|-----------------------------------|-------------------------------------------------------------------------|----------------------------------------------------------------------|
| pMSCV-RLUC-FLUC<br>UGA STOP CODON | GGAAGAAAGCGGCCGCTTCAGATCCGCTAGAGCC<br>CCAAGCTTGCACCAGTGACCAGCAAGGTGTACG | TGGATGCATGAATTTTCGTCATCGCTGAATAC<br>CGTACACCTTGTGGTCACTGGTGCAAGCTTGG |

**Table S2. Readthrough region**

| Gene name                                              | Readthrough context                                                  |
|--------------------------------------------------------|----------------------------------------------------------------------|
| AQP4 Aquaporin 4 NM_001650.4                           | ATCTGGAGAGGTATTGCTTTCAGTATGACTAGAAAGATCGCACTGAAAGCAGACAAGACTCCTTAGAA |
| ASPH Aspartate beta hydroxylase NM_004318.3            | AGAACAGCAGGAAGTACCACAGATACTTAAGCTTCAAAAAGACTGCCCTACCACCGGGCC         |
| FBL Fibrillarin NM_001436.3                            | GTACAGGCCACCCCAAGGTGAAGAAGTGAAGTTTCAGCGCTGTGAGGATTGCGAGAGATGGG       |
| HPN Hepsin NM_182983.2                                 | TCGAGGCCAGCGGCATGGTGACCCAGCTCTGACCGGTGGCTTCTGCTGCGCAGCCTCCAGGG       |
| MMuLV Moloney Murine Leukemia Virus                    | CTAGGGAGGTGAGGGTCTGAGGACCCCTGAAACCCAGGATAACCTCAAAGTCGGGGGGCC         |
| VASP Vasodilator-stimulated phosphoprotein NM_003370.3 | GGAGCTGAGGAAGCGGGTTCTCCCTGACCCAGGGACCCAGAAGACCCGCTTCTGGGCCCCA        |

Table S3. Readthrough candidates

| Readthrough code | Gene name                                                                        | peptides used by MS analysis | peptides + confintop-DNA 3'UTR | RTP (readthrough propensity) (Ref 22) | RTP Linfs3 (Ref 22) |        |
|------------------|----------------------------------------------------------------------------------|------------------------------|--------------------------------|---------------------------------------|---------------------|--------|
| RT_012331.1      | FAM134S family with sequence similarity 19 (chemokine [C-C motif])               | AFPSDGLRLR                   | NP_001074346                   | 3608                                  | 0.309               | 0.646  |
| RT_00885.1       | Zn2 finger protein 182                                                           | YGKSLSLSHLNPK                | NP_001171570.1, NP_001         | 3732                                  | 0.143               | 0.215  |
| RT_00208.1       | ACADS acyl-CoA dehydrogenase, C-2 to C-3 short chain                             | LGQMGAPVQGMQSLVPPR           | NP_000088.1, NP_000088.1       | 817                                   | -0.077              | 0.066  |
| RT_017649.1      | ACSL5 acyl-CoA synthetase long-chain family member 5                             | VLYLPAHCLLVR                 | NP_076313.1, NP_076314         | 690                                   | -0.08               | -0.226 |
| RT_009441.1      | ADCK2 aar domain containing kinase 2                                             | AGHSQEPFLVQLGR               | NP_443085.2, NP_01151          | 464                                   | 0.237               | 0.065  |
| RT_013024.1      | ADCY7 adenylylase cyclase 7                                                      | GILLDSEK                     | NP_001050.1, NP_01152          | 9511                                  | -0.029              | 0.028  |
| RT_02165.1       | ADGRE3 adhesion G protein-coupled receptor E5                                    | MVLDGPAAPVATALYTK            | NP_510966.1, NP_01151          | 6737                                  | 0.084               | 0.112  |
| RT_004627.1      | AES amino-terminal enhancer of split                                             | LGSGTGEGRQ                   | NP_945320.1, NP_00672          | 1                                     | 0.232               | 0.107  |
| RT_004601.1      | AGAP2 AGAP with GTPase domain, ankyrin repeat and PH domain                      | IEGLVHR                      | NP_005085.1, NP_00526          | 6583                                  | 0.059               | 0.072  |
| RT_008047.1      | AHL adenylate kinase 1                                                           | QKNGVDFSEPRFTFS              | NP_000467.1, NP_01151          | 5773                                  | 0.054               | 0.424  |
| RT_002208.1      | AKAP8L A kinase (PKA) anchor protein 8-like                                      | PELAGAGAR                    | NP_00129407, NP_00525          | 524                                   | 0.42                | 0.432  |
| RT_017612.1      | alpha-1,3-L-fucosyltransferase 9                                                 | NFSLAHNLMNR                  | NP_005072.2, NP_01151          | 652                                   | -0.081              | -0.089 |
| RT_022128.1      | AMOT1 angiomotin                                                                 | SRADYVQK                     | NP_573072.1, NP_01152          | 3141                                  | 0.051               | -0.111 |
| RT_017376.1      | ANKLE2 ankyrin repeat and LIM domain containing 2                                | EGRIVLNLCKD                  | NP_005929.1, NP_00526          | 2085                                  | -0.028              | -0.215 |
| RT_00581.1       | ANKRD35 ankyrin repeat domain 13 family, member D                                | AIAGGLALRPFAR                | NP_097217.2, NP_01154          | 10572                                 | 0.041               | 0.066  |
| RT_001281.1      | ANO10 anoctamin 10                                                               | GLICLITFCGAGGGTNGSVPFNP      | NP_00193762, NP_01151          | 7239                                  | 0.236               | 0.259  |
| RT_005813.1      | AP1 amyloid beta (A4) precursor-like protein 1                                   | ACTPLPFAPEQLPA               | NP_00109978.1, NP_001          | 2785                                  | 0.271               | 0.432  |
| RT_015810.1      | APPL2 adaptor protein, phosphotyrosine interaction, PH domain and LTRCAG         | NP_006412.1, NP_00671        | 20075                          | 0.027                                 | 0.147               |        |
| RT_023876.1      | AQP2B aquaporin 2B                                                               | ALSKSAAARSVPAR               | NP_0010150                     | 9555                                  | 0.214               | 0.066  |
| RT_00975.1       | ARHGAP17 Rho GTPase activating protein 17                                        | RTWRPRLK                     | NP_006254.4, NP_01154          | 3300                                  | 0.319               | 0.437  |
| RT_018159.1      | ARHGAP18 Rho guanine nucleotide exchange factor 1                                | IGLFLFNLYLR                  | NP_005025                      | 8079                                  | 0.186               | 0.382  |
| RT_023804.1      | ARPP21 cAMP-regulated phosphoprotein 21kDa                                       | KLQMGFNK                     | NP_00125455, NP_00671          | 4165                                  | 0.28                | 0.373  |
| RT_009721.1      | ASB14 ankyrin repeat and SOCS box containing 14, predicted transmembrane protein | ISSAWLAEGLLHGRSR             | NP_00626                       | 2144                                  | 0.161               | 0.151  |
| RT_011768.1      | ASPH aspartate beta-hydroxylase                                                  | KTAPITGGPA                   | NP_001152227.1, NP_001         | 5997                                  | 0.123               | 0.033  |
| RT_01317.1       | ASTN2 astrotactin 2                                                              | GRVLPVSTETLNGR               | NP_054729.3, NP_01151          | 235                                   | 0.001               | 0.028  |
| RT_013285.1      | AT9A9 autophagy related 9A                                                       | DSLIPR                       | NP_070990.4, NP_00307          | 1836                                  | 0.105               | 0.162  |
| RT_006571.1      | ATP10B ATPase, class V, type 10C                                                 | DREYKQDAR                    | NP_061586.3, NP_00624          | 2160                                  | 0.203               | 0.444  |
| RT_003127.1      | ATP11C ATPase, class VI, type 11C                                                | QMPNLELMLVYK                 | NP_079562.2, NP_01152          | 3117                                  | 0.129               | 0.152  |
| RT_007887.1      | ATP13A1 ATPase type 13A1                                                         | CPEMAHNVPTAFGRG              | NP_01151                       | 666                                   | -0.032              | 0.056  |
| RT_007205.1      | ATP16B ATPase, H+ transporting, lysosomal 21kDa, V0 subunit b                    | LVGVGPPCTFLLR                | NP_004038.1, NP_00304          | 2970                                  | 0.123               | 0.127  |
| RT_035167.1      | BCOR1 BC16 corepressor-like 1                                                    | LQNEAIR                      | NP_068705.3, NP_00526          | 1                                     | 0.176               | 0.341  |
| RT_003899.1      | C10orf105 chromosome 10 open reading frame 105                                   | WGVHQAFTSP                   | NP_001161862, NP_01151         | 9533                                  | 0.056               | -0.113 |
| RT_023546.1      | C10orf111 core 1 synthase, glycoprotein-N-acetylgalactosamine 3-beta             | KVMNMQGR                     | NP_064541.1, NP_00524          | 1008                                  | 0.112               | 0.056  |
| RT_024012.1      | C10orf138 chromosome 10 open reading frame 138                                   | IPNFQKQVSMDSYI               | NP_001007445, NP_00527         | 1009                                  | 0.127               | 0.382  |
| RT_014922.1      | C15 complement component 1, s subcomponent                                       | YIPASPR                      | NP_058850.1, NP_00525          | 4939                                  | 0.001               | -0.075 |
| RT_007816.1      | C22orf23 chromosome 22 open reading frame 23                                     | GQGLTFRVA                    | NP_072226.2, NP_00526          | 8506                                  | 0.116               | -0.15  |
| RT_019748.1      | C22orf23 chromosome 22 open reading frame 23                                     | LTPASAC; CSPSPTFCV           | NP_00193991, NP_00526          | 1593                                  | 0.131               | -0.134 |
| RT_013060.1      | C5orf60 chromosome 5 open reading frame 60                                       | VITIGLGLGR                   | NP_01151                       | 7069                                  | 0.364               | 0.122  |
| RT_014551.1      | CACNA1C calcium channel, voltage-dependent, P/Q type, alpha 1A                   | THFRFGKAGHR                  | NP_001120694.1, NP_01151       | 2949                                  | -0.086              | -0.112 |
| RT_018787.1      | CAPN1 capain 1, (mu) large subunit                                               | QPRPVPSPSHR                  | NP_001185797, NP_00671         | 4819                                  | 0.169               | 0.119  |
| RT_005409.1      | CAK calcium/calmodulin-dependent serine protein kinase (MAGUK) 1                 | IASLSALQZQVMVPR              | NP_001119527, NP_00672         | 1200                                  | -0.161              | -0.156 |
| RT_010840.1      | CDC58 coiled-coil domain containing serine protein kinase                        | REILFFFFRLLRTGSSHK           | NP_001017928, NP_00524         | 3768                                  | -0.285              | 0.259  |
| RT_004671.1      | CCL3 chemokine (C-C motif) ligand 3                                              | GVOKR                        | NP_002974.1, NP_01151          | 287                                   | 0.291               | 0.028  |
| RT_012415.1      | CCLN cyclin H                                                                    | PFVDFSMLTNEX                 | NP_0012930.1, NP_00188         | 7561                                  | 0.402               | 0.48   |
| RT_004395.1      | CD72 molecule                                                                    | NWVTPGK                      | NP_00671                       | 1058                                  | 0.231               | 0.147  |
| RT_016795.1      | CD82 molecule                                                                    | TLLPLTSLRSLGSA               | NP_002222.1, NP_00671          | 4030                                  | 0.065               | 0.119  |
| RT_006924.1      | CDH23 cadherin-related 23                                                        | FILGEGK                      | NP_001165402, NP_01151         | 7762                                  | 0.136               | 0.035  |
| RT_019066.1      | CDK2AP2 cyclin-dependent kinase 2 associated protein 2                           | LDLSDHCAPAPSPSR              | NP_008421.1, NP_01151          | 4819                                  | 0.153               | 0.152  |
| RT_00865.1       | CEK1A4 carcinoembryonic antigen-related cell adhesion molecule 4                 | KEGALVPLFHIG                 | NP_00107004, NP_00526          | 3977                                  | 0.015               | -0.122 |
| RT_022767.1      | CEP350 centrosomal protein 350kDa-like 1                                         | QNKYVFLMNPVSETLNCLWF         | NP_00107004, NP_00526          | 8129                                  | 0.29                | 0.468  |
| RT_002951.1      | CFAP4 cilia and flagella associated 4                                            | INTRODKTR                    | NP_01151                       | 1470                                  | 0.333               | 0.666  |
| RT_023936.1      | CHRF3 complement factor H-related 3                                              | GSVTLVNCVSTPFLRLMVGSK        | NP_066303.3, NP_001166         | 9546                                  | 0.059               | -0.059 |
| RT_003463.1      | CHRN1 cholinergic receptor, nicotinic, alpha 1                                   | AEMELSLPFWNFCQRAGEEELSM      | NP_000070.1, NP_01151          | 1587                                  | 0.219               | 0.292  |
| RT_011669.1      | CLEC12A C-type lectin domain family 12, member A                                 | SVGGGDSRL                    | NP_001193939, NP_01151         | 2968                                  | 0.238               | 0.119  |
| RT_010570.1      | COG3 component of oligomeric golgi complex 3                                     | SLAVKTRP                     | NP_113619.2, NP_01151          | 3531                                  | 0.213               | 0.114  |
| RT_014946.1      | COL1A1 collagen, type I, alpha 1                                                 | TFPHTLFPQTFPFR               | NP_000079.2, NP_01151          | 3380                                  | 0.046               | -0.078 |
| RT_004138.1      | COL4A4 collagen, type IV, alpha 4                                                | RMRNFPTR                     | NP_000083.3, NP_00524          | 180                                   | 0.2                 | 0.215  |
| RT_014934.1      | CORO2A coronin, actin binding protein, 2A                                        | AETSLTLR                     | NP_438171.1, NP_01151          | 20475                                 | 0.259               | 0.292  |
| RT_004782.1      | CPS1 carbonyl phosphate synthase 1, mitochondrial                                | HPSHR                        | NP_001116205, NP_01150         | 5966                                  | 0.222               | 0.215  |
| RT_011692.1      | CREB3L4 cAMP responsive element binding protein 3-like 4                         | AGDLPGLPQHK                  | NP_570968.1, NP_00671          | 671                                   | 0.075               | 0.008  |
| RT_012161.1      | CLX1 cut-like homeobox 1                                                         | GAALGRAAR                    | NP_001189472, NP_01151         | 2074                                  | 0.237               | 0.028  |
| RT_013211.1      | CYB5B1 cytochrome b5-like                                                        | RLQDQRLA                     | NP_001006.3, NP_00525          | 12362                                 | 0.292               | 0.156  |
| RT_019392.1      | CYB5D cytochrome b5 domain containing 2                                          | AVASVNTQRALPST               | NP_001241685, NP_01152         | 4132                                  | 0.057               | -0.112 |
| RT_011989.1      | CY8 cytochrome 8                                                                 | APVNDKHMAYQHAARPAFLP         | NP_001151                      | 1296                                  | 0.399               | 0.658  |
| RT_016292.1      | DAAH2 dishevelled associated activator of morphogenesis 2                        | PGLATQAGRQGLVR               | NP_001188356, NP_00671         | 12479                                 | 0.226               | 0.373  |
| RT_013823.1      | DACH1 dachshund family transcription factor 1                                    | VLELRPEFCVLMFKR              | NP_004383.4, NP_01151          | 5689                                  | 0.121               | 0.44   |
| RT_013666.1      | DENND2A DENN/MADD domain containing 2A                                           | LGSSLDEHGAWEVSPKGR           | NP_005040.3, NP_00526          | 6495                                  | 0.12                | 0.536  |
| RT_013006.1      | DGDO decylglyoxylase, delta 130kDa                                               | RLSHWALWPS                   | NP_006018.2, NP_01151          | 2801                                  | 0.227               | 0.151  |
| RT_02327.1       | DHODH dihydroorotate dehydrogenase (quinone)                                     | LSVWPWDHK                    | NP_001352.2, NP_00525          | 1317                                  | 0.035               | 0.345  |
| RT_00739.1       | DOCK11 dedicator of cytokinesis 11                                               | GNADYVNDLQSLYELCK            | NP_613209.3, NP_00526          | 4740                                  | 0.306               | 0.345  |
| RT_012489.1      | DOCK4 dedicator of cytokinesis 4                                                 | TVQVCLITLQAPMNGK             | NP_005200.3, NP_01151          | 796                                   | 0.054               | 0.17   |
| RT_011312.1      | DOCK8 dedicator of cytokinesis 8                                                 | EPKPSFVETLQVPR               | NP_002272.2, NP_01151          | 2611                                  | 0.054               | 0.103  |
| RT_017352.1      | DOHH decylhydroxylase/hydroxylase/monooxygenase                                  | SRPAELWR                     | NP_001138637, NP_01151         | 1607                                  | 0.047               | 0.103  |
| RT_009501.1      | DRP4 developmental protein associated 4                                          | ATSMVINGRK                   | NP_006069.3, NP_01151          | 23756                                 | 0.046               | -0.134 |
| RT_014102.1      | DRAM1 DNA-damage regulated autophagy modulator 1                                 | NSVLSDECR                    | NP_006840.2, NP_00526          | 626                                   | 0.267               | 0.437  |
| RT_014648.1      | DUSP12 dual specificity phosphatase 18                                           | AFHPALESEVQYIC               | NP_689724.3, NP_00672          | 1                                     | 0.309               | 0.066  |
| RT_024715.1      | DUSP22 dual specificity phosphatase 22                                           | LGQAVVVAEDER                 | NP_001273484, NP_01151         | 1                                     | 0.23                | 0.307  |
| RT_006951.1      | EDN3 endothelin 3                                                                | FPVLYRQVLPQAEHPK             | NP_960917.1, NP_01152          | 1113                                  | 0.153               | -0.258 |











**Table S4.**

Relative Fluc fold change

| Condition     | N1     | N2            | N3     |
|---------------|--------|---------------|--------|
| Norm Fluc/Ruc | SD     | Norm Fluc/Ruc | SD     |
| Vector        | 1.0000 | 1.0000        | 1.0000 |
| H-Ras V12-D5  | 0.9593 | 0.9209        | 0.9202 |
| H-Ras V12-D12 | 0.9563 | 0.9336        | 0.9347 |
| H-Ras V12-D28 | 0.9453 | 0.9241        | 0.9283 |

  

| Condition     | N1     | N2            | N3     |
|---------------|--------|---------------|--------|
| Norm Fluc/Ruc | SD     | Norm Fluc/Ruc | SD     |
| Vector        | 1.0000 | 1.0000        | 1.0000 |
| H-Ras V12-D5  | 1.7850 | 0.6203        | 0.8558 |
| H-Ras V12-D12 | 0.7813 | 0.0213        | 0.2300 |
| H-Ras V12-D28 | 0.9394 | 0.0507        | 0.2036 |

  

| Condition     | N1     | N2            | N3      |
|---------------|--------|---------------|---------|
| Norm Fluc/Ruc | SD     | Norm Fluc/Ruc | SD      |
| Vector        | 1.0000 | 1.0000        | 1.0000  |
| H-Ras V12     | 0.4507 | 0.1307        | 0.2343  |
| Vector Gen    | 1.9220 | 0.0264        | 11.3030 |
| H-Ras V12 Gen | 1.1860 | 0.1066        | 1.7875  |

  

| Condition     | N1     | N2            | N3     |
|---------------|--------|---------------|--------|
| Norm Fluc/Ruc | SD     | Norm Fluc/Ruc | SD     |
| Vector        | 1.0000 | 0.9584        | 1.0000 |
| H-Ras V12     | 0.3274 | 0.1348        | 0.5268 |
| Vector Gen    | 2.4203 | 0.4244        | 1.8830 |
| H-Ras V12 Gen | 0.9056 | 0.0759        | 1.4380 |

  

| Condition     | N1     | N2            | N3     |
|---------------|--------|---------------|--------|
| Norm Fluc/Ruc | SD     | Norm Fluc/Ruc | SD     |
| Vector        | 0.7927 | 0.2747        | 1.0000 |
| H-Ras V12     | 1.0000 | 0.0011        | 1.2630 |
| Vector Gen    | 0.7581 | 0.0735        | 1.0250 |
| H-Ras V12 Gen | 1.646  | 0.1354        | 1.3480 |

  

| Condition     | N1     | N2            | N3     |
|---------------|--------|---------------|--------|
| Norm Fluc/Ruc | SD     | Norm Fluc/Ruc | SD     |
| Vector        | 1.1310 | 0.1031        | 0.8210 |
| PML-ER        | 1.0800 | 0.2771        | 1.0000 |
| Vector 4OHT   | 1.1430 | 0.1341        | 0.8441 |
| PML-ER 4OHT   | 0.9587 | 0.1138        | 0.9200 |

  

| Condition     | N1     | N2            | N3     |
|---------------|--------|---------------|--------|
| Norm Fluc/Ruc | SD     | Norm Fluc/Ruc | SD     |
| Vector        | 1.0000 | 0.0554        | 1.0000 |
| PML-ER        | 0.8623 | 0.0563        | 0.9104 |
| Vector 4OHT   | 1.1640 | 0.2160        | 1.0570 |
| PML-ER 4OHT   | 0.6873 | 0.0927        | 0.7387 |

  

| Condition     | N1     | N2            | N3     |
|---------------|--------|---------------|--------|
| Norm Fluc/Ruc | SD     | Norm Fluc/Ruc | SD     |
| Vector        | 1.0000 | 0.0107        | 1.0000 |
| PML-ER        | 0.8476 | 0.0784        | 0.9101 |
| Vector 4OHT   | 1.0130 | 0.1778        | 1.1320 |
| PML-ER 4OHT   | 0.8051 | 0.1133        | 0.8146 |

Relative Fluc fold change

| Condition     | N1     | N2            | N3     |
|---------------|--------|---------------|--------|
| Norm Fluc/Ruc | SD     | Norm Fluc/Ruc | SD     |
| Vector D12    | 1.0000 | 0.2130        | 1.0000 |
| H-Ras V12 D12 | 0.8578 | 0.1954        | 0.7436 |
| Vector D35    | 1.0000 | 0.0378        | 1.0000 |
| H-Ras V12 D35 | 0.9529 | 0.0330        | 1.0336 |

  

| Condition     | N1     | N2            | N3     |
|---------------|--------|---------------|--------|
| Norm Fluc/Ruc | SD     | Norm Fluc/Ruc | SD     |
| Vector D12    | 1.0000 | 0.2054        | 1.0000 |
| H-Ras V12 D12 | 0.3274 | 0.1348        | 0.5268 |
| Vector D35    | 1.0000 | 0.0378        | 1.0000 |
| H-Ras V12 D35 | 1.5119 | 0.3544        | 1.8362 |

  

| Condition     | N1     | N2            | N3     |
|---------------|--------|---------------|--------|
| Norm Fluc/Ruc | SD     | Norm Fluc/Ruc | SD     |
| Vector D12    | 1.0000 | 0.2050        | 1.0000 |
| H-Ras V12 D12 | 0.7189 | 0.0187        | 1.0000 |
| Vector D35    | 1.0000 | 0.2036        | 1.0000 |
| H-Ras V12 D35 | 2.3362 | 0.3314        | 2.2841 |

  

| Condition     | N1     | N2            | N3     |
|---------------|--------|---------------|--------|
| Norm Fluc/Ruc | SD     | Norm Fluc/Ruc | SD     |
| Vector D12    | 1.0000 | 0.2050        | 1.0000 |
| H-Ras V12 D12 | 0.5396 | 0.1724        | 0.4845 |
| Vector D35    | 1.0000 | 0.2036        | 1.0000 |
| H-Ras V12 D35 | 3.3752 | 0.3530        | 1.6540 |

  

| Condition     | N1     | N2            | N3     |
|---------------|--------|---------------|--------|
| Norm Fluc/Ruc | SD     | Norm Fluc/Ruc | SD     |
| Vector        | 1.0000 | 0.1731        | 1.0000 |
| H-Ras V12     | 0.3856 | 0.2237        | 0.6659 |
| H-Ras V12E6   | 0.4181 | 0.0877        | 0.8446 |
| H-Ras V12E67  | 2.3976 | 0.4076        | 3.8336 |

  

| Condition     | N1     | N2            | N3     |
|---------------|--------|---------------|--------|
| Norm Fluc/Ruc | SD     | Norm Fluc/Ruc | SD     |
| Vector        | 1.0000 | 0.2050        | 1.0000 |
| H-Ras V12     | 0.2937 | 0.078         | 0.8011 |
| H-Ras V12E6   | 0.3333 | 0.0778        | 0.9688 |
| H-Ras V12E67  | 0.9557 | 0.3248        | 1.374  |

  

| Condition     | N1     | N2            | N3     |
|---------------|--------|---------------|--------|
| Norm Fluc/Ruc | SD     | Norm Fluc/Ruc | SD     |
| Vector        | 1      | 0.2191        | 1      |
| H-Ras V12     | 0.4874 | 0.02819       | 0.4709 |
| H-Ras V12E6   | 0.8765 | 0.01425       | 0.4316 |
| H-Ras V12E67  | 1.844  | 0.3842        | 0.9383 |

  

| Condition          | N1     | N2            | N3     |
|--------------------|--------|---------------|--------|
| Norm Fluc/Ruc      | SD     | Norm Fluc/Ruc | SD     |
| Vector             | 1      | 0.1713        | 1      |
| H-Ras V12          | 0.3133 | 0.0854        | 0.5884 |
| H-Ras V12 E7       | 0.9597 | 0.1668        | 0.8384 |
| H-Ras V12 E7A21-24 | 0.2852 | 0.0311        | 0.3682 |

  

| Condition       | N1     | N2            | N3     |
|-----------------|--------|---------------|--------|
| Norm Fluc/Ruc   | SD     | Norm Fluc/Ruc | SD     |
| Vector          | 1      | 0.0912        | 1      |
| H-Ras V12       | 0.8729 | 0.07417       | 0.7811 |
| Vector CDK4     | 0.9616 | 0.2399        | 1.127  |
| H-Ras V12E6CDK4 | 0.8721 | 0.08102       | 1.397  |

Relative Fluc fold change

| Condition          | N1     | N2            | N3     |
|--------------------|--------|---------------|--------|
| Norm Fluc/Ruc      | SD     | Norm Fluc/Ruc | SD     |
| Vector             | 1.0000 | 1.0000        | 1.0000 |
| H-Ras V12          | 1.372  | 0.1402        | 0.8938 |
| Vector Palbo       | 20.4   | 3.266         | 10.59  |
| Vector Palbo + Gen | 11.23  | 1.73          | 1.708  |

  

| Condition          | N1     | N2            | N3     |
|--------------------|--------|---------------|--------|
| Norm Fluc/Ruc      | SD     | Norm Fluc/Ruc | SD     |
| Vector             | 1.0000 | 1.0000        | 1.0000 |
| H-Ras V12          | 0.7022 | 0.0302        | 0.9950 |
| Vector D35         | 1.0000 | 0.2612        | 4.8140 |
| Vector Palbo + Gen | 1.3210 | 0.1188        | 5.2490 |

  

| Condition           | N1     | N2            | N3     |
|---------------------|--------|---------------|--------|
| Norm Fluc/Ruc       | SD     | Norm Fluc/Ruc | SD     |
| Vector D35          | 1      | 1.42          | 1      |
| H-Ras V12 D35       | 1.466  | 0.1202        | 1.25   |
| Vector D35 Palbo    | 0.873  | 0.2202        | 0.7346 |
| H-Ras V12 D35 Palbo | 0.8395 | 0.0812        | 0.7551 |

  

| Condition     | N1     | N2            | N3     |
|---------------|--------|---------------|--------|
| Norm Fluc/Ruc | SD     | Norm Fluc/Ruc | SD     |
| Vector D5     | 1.0000 | 0.2050        | 1.0000 |
| H-Ras V12 D5  | 0.8620 | 0.3315        | 0.9551 |
| Vector D28    | 1.0000 | 0.1937        | 0.8956 |

  

| Condition     | N1     | N2            | N3    |
|---------------|--------|---------------|-------|
| Norm Fluc/Ruc | SD     | Norm Fluc/Ruc | SD    |
| Vector D12    | 0.9991 | 0.2321        | 0.931 |
| Vector D12    | 0.7887 | 0.1582        | 1.004 |
| Vector D35    | 0.7829 | 0.1658        | 1.056 |

  

| Condition     | N1     | N2            | N3     |
|---------------|--------|---------------|--------|
| Norm Fluc/Ruc | SD     | Norm Fluc/Ruc | SD     |
| VectorStar    | 1      | 0.2623        | 1      |
| H-Ras V12Star | 0.4751 | 0.0574        | 0.5905 |
| Vector FBS    | 0.928  | 0.2028        | 0.8961 |
| H-Ras V12E67  | 0.8000 | 0.1223        | 0.889  |

  

| Condition      | N1       | N2            | N3       |
|----------------|----------|---------------|----------|
| Norm Fluc/Ruc  | SD       | Norm Fluc/Ruc | SD       |
| HPN-Vector     | 0.07324  | 0.99999       | 0.00011  |
| HPN-H-Ras V12  | 0.388893 | 0.384338      | 0.728758 |
| VASP-Vector    | 0.999999 | 0.00484       | 0.999999 |
| VASP-H-Ras V12 | 0.748287 | 0.05055       | 0.876331 |
| ASPH-Vector    | 0        | 0             | 0        |
| ASPH-H-Ras V12 | 0        | 0             | 0        |
| FBL-Vector     | 0.178778 | 0.999999      | 0.187891 |
| FBL-H-Ras V12  | 0.641643 | 0.16488       | 0.830588 |

  

| Condition      | N1      | N2            | N3     |
|----------------|---------|---------------|--------|
| Norm Fluc/Ruc  | SD      | Norm Fluc/Ruc | SD     |
| HPN-Vector     | 0.0240  | 0.9702        | 0.0087 |
| HPN-H-Ras V12  | 0.7846  | 0.2833        | 2.4933 |
| VASP-Vector    | 19.0749 | 1.8238        | 4.4482 |
| VASP-H-Ras V12 | 0.2412  | 1.1154        | 3.1288 |
| ASPH-Vector    | 3.6887  | 0.4123        | 1.0000 |
| ASPH-H-Ras V12 | 2.4933  | 1.4170        | 0.1653 |
| FBL-Vector     | 3.1437  | 0.4300        | 1.8573 |
| FBL-H-Ras V12  | 1.7089  | 0.1028        | 1.0205 |

  

| Condition       | N1     | N2            | N3    |
|-----------------|--------|---------------|-------|
| Norm Fluc/Ruc   | SD     | Norm Fluc/Ruc | SD    |
| Vector          | 1      | 0.1713        | 1     |
| Vector E7       | 1.206  | 0.2172        | 1.121 |
| Vector E7A21-24 | 0.8017 | 0.1072        | 1.321 |

Fluc/Ruc

| Condition     | N1     | N2       | N3     |
|---------------|--------|----------|--------|
| Fluc/Ruc      | SD     | Fluc/Ruc | SD     |
| Vector D5     | 0.1813 | 0.01333  | 0.1832 |
| H-Ras V12-D5  | 0.1915 | 0.03221  | 0.1917 |
| Vector D12    | 0.1777 | 0.02328  | 0.2036 |
| H-Ras V12-D12 | 0.1877 | 0.05967  | 0.1853 |
| Vector D28    | 0.1976 | 0.0184   | 0.187  |
| H-Ras V12-D28 | 0.2116 | 0.02771  | 0.2083 |

  

| Condition              | N1     | N2       | N3     |
|------------------------|--------|----------|--------|
| Fluc/Ruc               | SD     | Fluc/Ruc | SD     |
| Vector                 | 0.1568 | 0.03292  | 0.1633 |
| H-Ras V12              | 0.1553 | 0.007874 | 0.1812 |
| Vector CDK4-1          | 0.973  | 0.098    | 1.545  |
| H-Ras V12 CDK4-1       | 0.837  | 0.178    | 0.860  |
| Vector Gen             | 7.038  | 0.741    | 5.910  |
| H-Ras V12 Gen          | 3.702  | 0.460    | 3.876  |
| Vector CDK4-1 + Gen    | 16.828 | 3.804    | 14.750 |
| H-Ras V12 CDK4-1 + Gen | 4.898  | 0.400    | 4.784  |

  

| Condition              | N1     | N2       | N3     |
|------------------------|--------|----------|--------|
| Fluc/Ruc               | SD     | Fluc/Ruc | SD     |
| Vector                 | 1.000  | 0.000    | 1.124  |
| H-Ras V12              | 0.625  | 0.162    | 0.748  |
| Vector CDK4-1          | 0.973  | 0.098    | 1.545  |
| H-Ras V12 CDK4-1       | 0.837  | 0.178    | 0.860  |
| Vector Gen             | 7.038  | 0.741    | 5.910  |
| H-Ras V12 Gen          | 3.702  | 0.460    | 3.876  |
| Vector CDK4-1 + Gen    | 16.828 | 3.804    | 14.750 |
| H-Ras V12 CDK4-1 + Gen | 4.898  | 0.400    | 4.784  |

**Table S5. Real time PCR primers**

| Gene Name  | 5' forward primer (5'-3') | 3' reverse primer (5'-3') |
|------------|---------------------------|---------------------------|
| BRCA1      | GGTTGTTGATGTGGAGGGGCAA    | CCAGATTCCAGGTAAGGGGTTTC   |
| CDKN1A/p21 | ACCCTTGTGCCTCGCTCAGG      | GCGTTTGGAGTGGTAGAAATCTGT  |
| CDK4       | CAGTGCAGTCGGTGGTACCTGA    | GGCAGAGATTTCGCTTGTGTGG    |
| CENPA      | AATGGATTCTGCGATGCTGTCTGG  | TTTTTCAGGCCTTTGGAACGGTGTT |
| FANCD2     | CCTTAGTAGCCGACTGAAACAGG   | TGCAAGTAATGGACGCTCTG      |
| GADD45A    | TTGCAATATGACTTTGGAGGAA    | CATCCCCACCTTATCCAT        |
| HMBS       | GGCAATGCGGCTGCAA          | GGGTACCCACGCGAATCAC       |
| H-RAS      | TTGCCATCAACAACACCAAGTC    | ATCCGAGTCCTTCACCCGTTTG    |
| KI67       | AGAAGACAGTACCGCAGATGA     | CGGCTCACTAATTTAACGCTGG    |
| MCM6       | ATCCCTCTTGCCAAGGATTT      | GAAAAGTTCCGCTCACAAGC      |
| ORC1L      | CCCGGCTCAAGCATCYAAAGG     | TCGTGCATCTCCAGACAGTCT     |
| TBP        | GCTGGCCCATAGTGATCTTTGC    | CTTACACGCCAAGAAACAGTGA    |
| MCM6       | ATCCCTCTTGCCAAGGATTT      | GAAAAGTTCCGCTCACAAGC      |
| IL-6       | CCAGGAGCCCAGCTATGAACTC    | AAGGCAGCAGGCAACACCAG      |
| CXCL8/IL-8 | GGCACAAACTTTCAGAGACAGCA   | GGCAAAACTGCACCTTCACACA    |
